# Supplementary material
Source: PubMed Central journal article supplement (PMC5383632)
Supplement: mmc1.pdf [file mmc1.pdf]

## **Supplemental Information**

### **A Novel DNA Vaccine Platform Enhances Neo-antigen-like T Cell Responses against WT1 to Break Tolerance and Induce Anti-tumor Immunity**

**Jewell N. Walters, Bernadette Ferraro, Elizabeth K. Duperret, Kimberly A. Kraynyak, Jaemi Chu, Ashley Saint-Fleur, Jian Yan, Hy Levitsky, Amir S. Khan, Niranjan Y. Sardesai, and David B. Weiner**

**Figure S1**

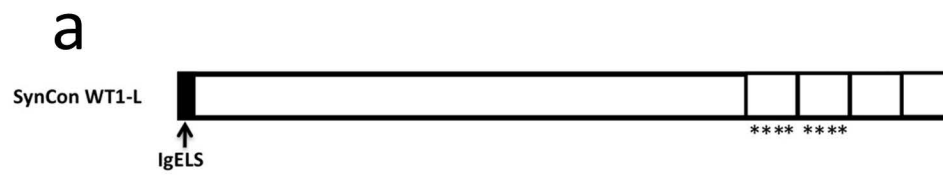

**b**

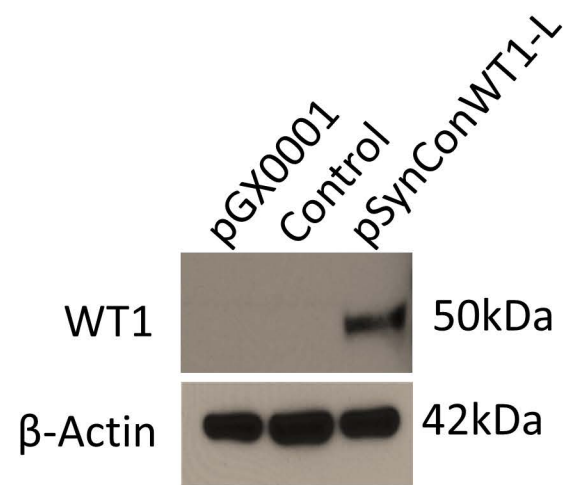

**c**

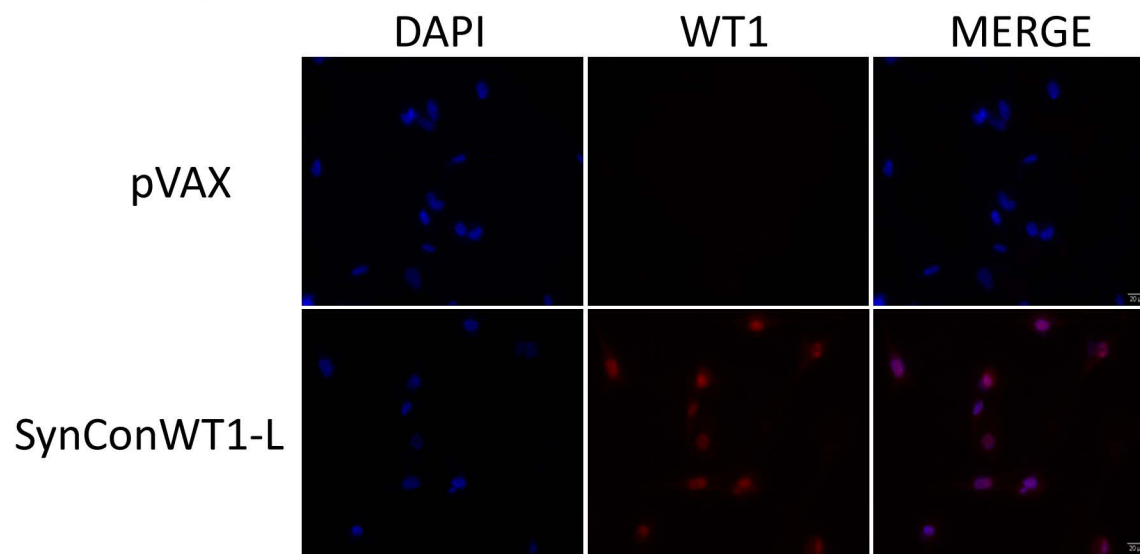

# Figure S2

a

## WT1-specific IFN-gamma ELISpot Consensus Peptides

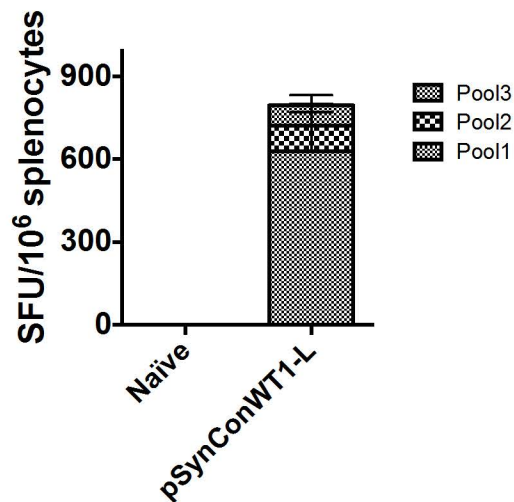

b

## WT1-specific IFN-gamma ELISpot Consensus Peptides

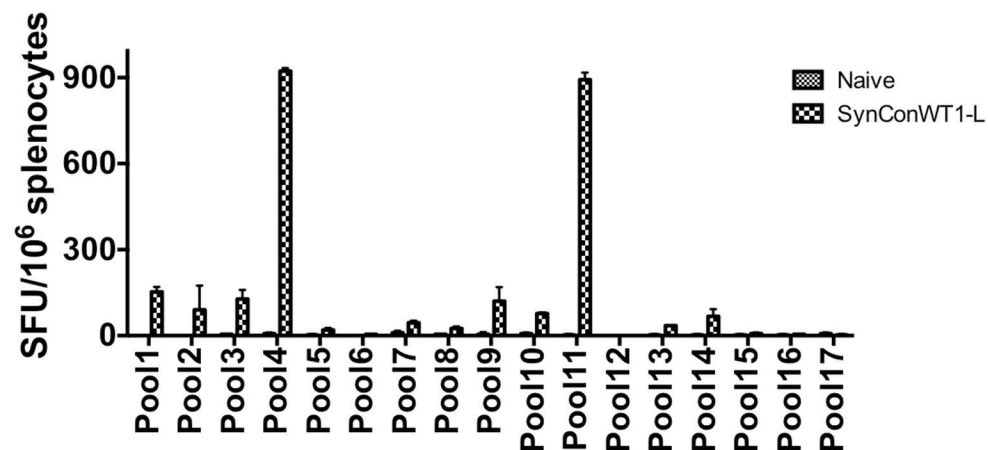

c

| Plasmid                       | Pool #                 | No. of Epitope-Comprising Peptides | Sequence of Epitope-Comprising Peptides                                                                                                                                                                                                                                                                                                                                       | Corresponding mouse sequence                                                                                                                                                                                                                                                                                                                                                                                                                                                       |
|-------------------------------|------------------------|------------------------------------|-------------------------------------------------------------------------------------------------------------------------------------------------------------------------------------------------------------------------------------------------------------------------------------------------------------------------------------------------------------------------------|------------------------------------------------------------------------------------------------------------------------------------------------------------------------------------------------------------------------------------------------------------------------------------------------------------------------------------------------------------------------------------------------------------------------------------------------------------------------------------|
| WT1-L<br>(Consensus Peptides) | Pool 1<br>aa 1 - 171   | 18 Peptides                        | ATRVHSGSDVRDLNA - GSDVRDLNALLPAVP -<br>LNALLPAVPSLPGGG - AVPSLPGGGGCALPV -<br>AQWAPVLDFAPPAAP - LDFAPPAAPYGSLLGG -<br><b>AAPYGSLLGGPHSFIK</b> -<br>LGGPHSFIKQEPSWG -<br>FIKQEPSWGGADPHE - SWGGADPHEEQCLSA<br>- HFSGQFTGTAGACRY - TGTAGACRYGPFGAP<br>- CRYGPFGAPPSQAP -<br><b>GAPPSQAPSGQARM</b> - QAPSGQARMFPNAPY<br>- ARMFPNAPYLPNCLE - AIRNQGYSTVAFDGT<br>- YSTVAFDGTPSYGHT | ATRVHSGSDVRDLNA - GSDVRDLNALLPAVS-<br>LNALLPAVSSLGGGG - AVSSLGGGGGGCGLPV-<br>AQWAPVLDFAPP <b>GAS</b> - LDFAPP <b>GAS</b> AYGSLLGG-<br><b>ASAYGSLLGGPAPPPAPPPPPPHSFIK</b> -<br>LGG <b>PAPPPAPPPPPPHSFIKQEPSWG</b> -<br>FIKQEPSWGGAEPE - SWGGAE <b>PHEEQCLSA</b> -<br>HFSGQFTGTAGACRY - TGTAGACRYGPF <b>GP</b> -<br>CRYGPF <b>GPPPSQAS</b> -<br><b>GPPPSQASSGQARM</b> - Q <b>ASSGQARMFPNAPY</b> -<br>ARMFPNAPYLP <b>SCLE</b> - TIRNQGYSTV <b>TFDGA</b> -<br>YSTV <b>TFDGA</b> PSYGHT |
|                               | Pool 2<br>aa 163- 321  | 12 Peptides                        | HTPDSDCTGSQALLL - CTGSQALLLRTPYNS -<br>LLLRTPYNSDNLYQM - YNSDNLYQMMSQLEC -<br>NQMNLG <b>STLKGHATG</b> -<br>STLKG <b>HATGYESDNH</b> -<br><b>DNHTTPMLYSCGAQY</b> - <b>ATGYESDNHTTPMLY</b> -<br><b>MLYSCGAQYRIHTHG</b> - AQYRIHTHGVFRGIQ -<br>RV <b>PGVAPTIVRSASE</b> - PT <b>IVRSASETNEKRP</b>                                                                                  | HTPDSDCTGSQALLL - CTGSQALLLRTPY <b>SS</b> -<br>LLLRTPY <b>SSDNLYQM</b> - Y <b>SSDNLYQMMSQLEC</b> -<br>NQMNLG <b>ATLKGMAAG</b> -<br><b>ATLKGMAAGSSSSVKWTEGQSNHGTGYES</b> <b>ENH</b> -<br><b>ENHTAPILCGAQY</b> - <b>GTGYES</b> <b>ENHTAPIL</b> -<br>LCGAQYRIHTHG - AQYRIHTHG <b>VFRGIQ</b> -<br>RV <b>SGVAPTIVRSASE</b> - PT <b>LIVRSASETSEKRP</b>                                                                                                                                   |
|                               | Pool 3<br>aa 313 - 436 | None                               |                                                                                                                                                                                                                                                                                                                                                                               |                                                                                                                                                                                                                                                                                                                                                                                                                                                                                    |

# Figure S3

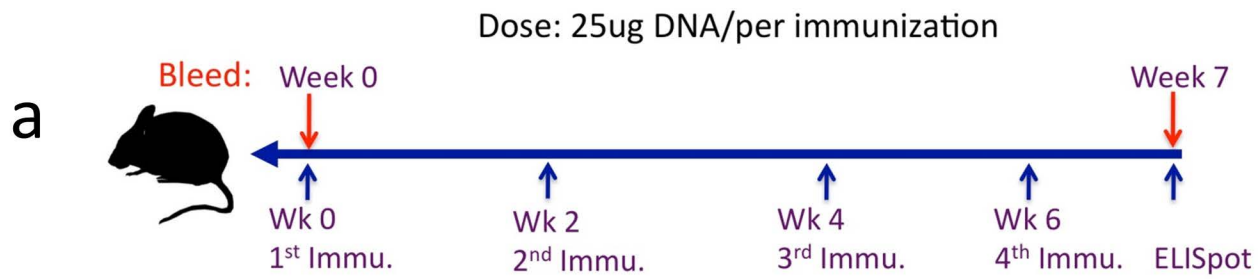

**b**

**WT1-specific IFN-gamma ELISpot  
Mouse Matched Peptides**

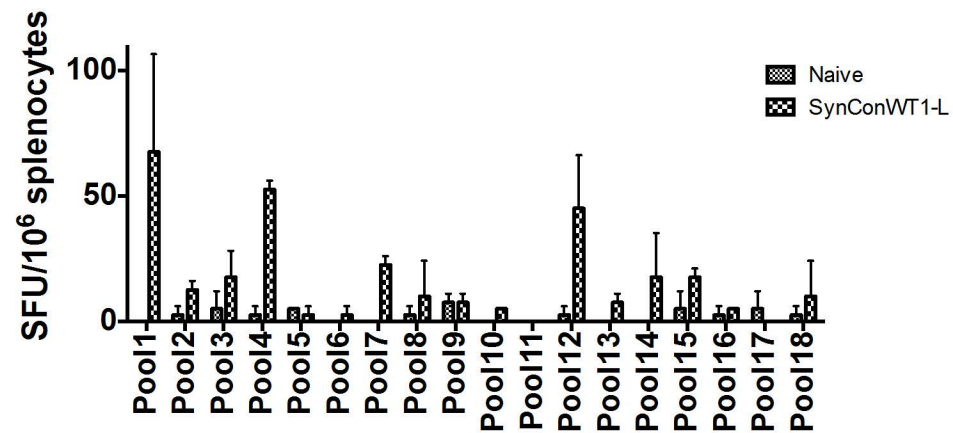

**c**

| Plasmid/Peptide           | Pool Number            | No. of Epitope-Comprising Peptides | Sequence of Epitope-Comprising Peptides                                                                     | Corresponding SynCon sequence                                                                      |
|---------------------------|------------------------|------------------------------------|-------------------------------------------------------------------------------------------------------------|----------------------------------------------------------------------------------------------------|
| WT1-L<br>(Mouse Peptides) | Pool 1<br>aa 1 - 154   | 3 Peptides                         | <b>AGACRYGPFGRPPPS</b><br><b>SGQARMFPNAPYLP</b> <b>S</b><br><b>SQP</b> <b>T</b> IRNQGYSTV <b>T</b> <b>F</b> | <b>AGACRYGPFGR</b> APPPS-<br>SGQARMFPNAPYLP <b>N</b> -<br>SQP <b>A</b> IRNQGYSTV <b>A</b> <b>F</b> |
|                           | Pool 2<br>aa 146 - 304 | None                               |                                                                                                             |                                                                                                    |
|                           | Pool 3<br>aa 296 - 449 | None                               |                                                                                                             |                                                                                                    |

# Figure S4

## a

### Tumor Therapeutic Study

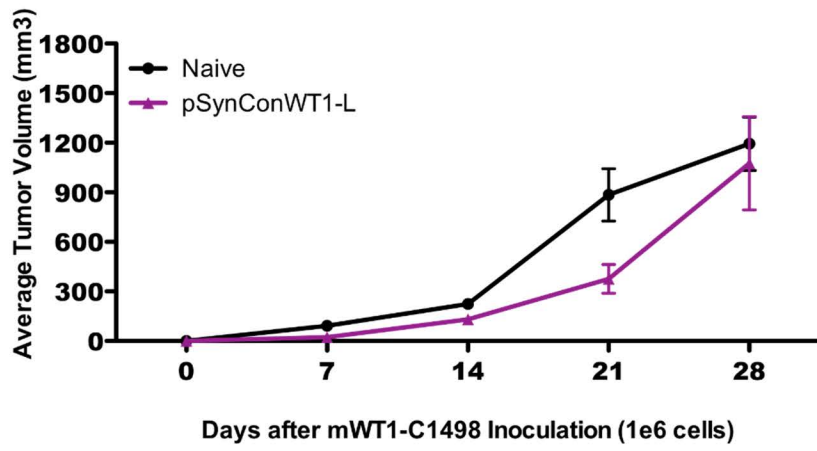

## b

### Tumor Therapeutic Study Survival Data

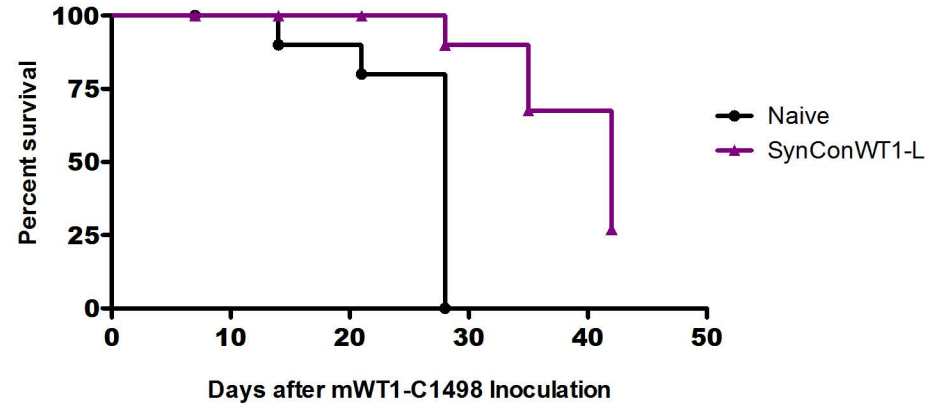

# Figure S5

a

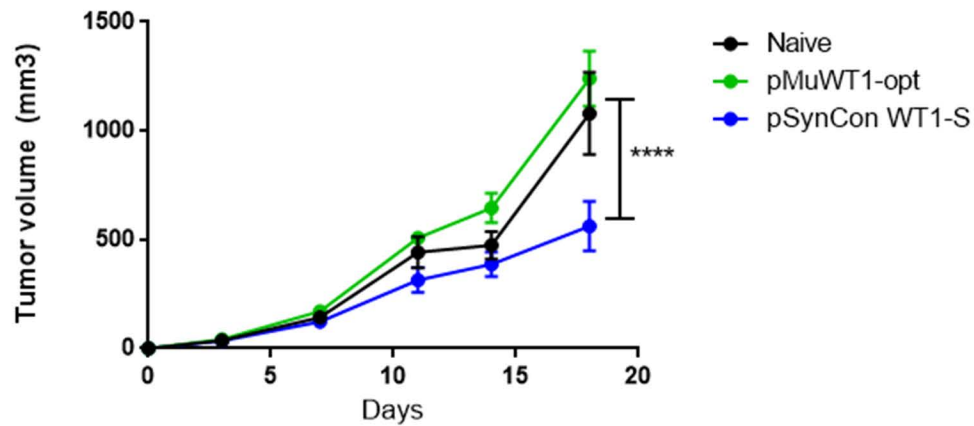

b

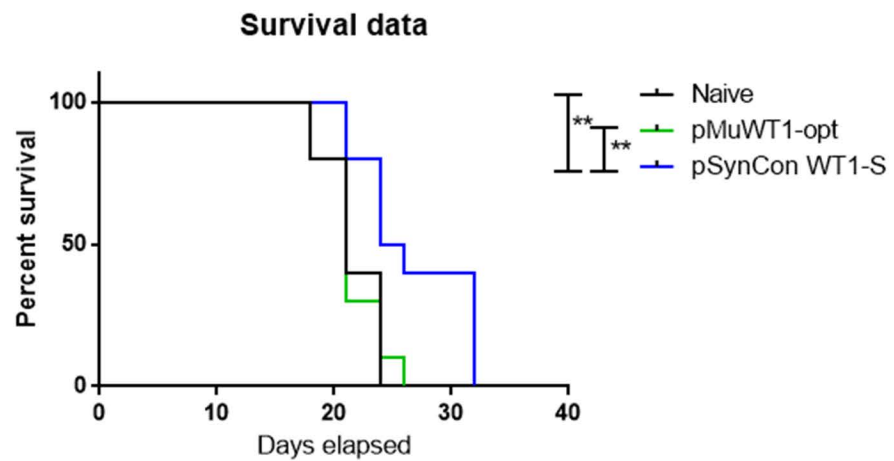

**Table S1****Assessment of physiological parameters in rhesus macaques immunized with WT1**

|                                        | Pre-Vaccination | Post-Vaccination |          | Normal Range    |
|----------------------------------------|-----------------|------------------|----------|-----------------|
|                                        | Week 0          | Week 6           | Week 14  |                 |
| <b>WBC Count (#/10<sup>3</sup>/ml)</b> | 5-9.6           | 3.8-12.7         | 3.5-9.1  | <b>4.0-15.0</b> |
| <b>Creatinine (mg/dL)</b>              | 0.7-1.0         | 0.8-1.2          | 0.8-1.2  | <b>0.3-1.4</b>  |
| <b>BUN (mg/dL)</b>                     | 12-21           | 10-14            | 13-19    | <b>9-29</b>     |
| <b>CPK</b>                             | 251-482         | 200-451          | 287-1146 | <b>63-3878</b>  |
| <b>ALK P (U/L)</b>                     | 83-312          | 80-267           | 96-213   | <b>65-641</b>   |
| <b>AST (U/L)</b>                       | 23-32           | 21-26            | 28-38    | <b>23-175</b>   |
| <b>ALT (U/L)</b>                       | 18-40           | 20-64            | 20-65    | <b>18-204</b>   |
| <b>TBIL (mg/dL)</b>                    | 0.1-0.2         | 0.1-0.2          | 0.1-0.2  | <b>0.1-0.6</b>  |

Out of Upper Range Animal ID -

## Supplemental Figure Legends

**Figure S1. In vitro expression of pSynConWT1-L vaccine.** (a) Plasmid map of pSynConWT1-L. The stars indicate point mutations to inactivate WT1 function. (b) Detection of pSynConWT1-L expression by immunoblotting in transfected RD cells. (c) Immunofluorescence assay of pSynConWT1-L in transfected RD cells.

**Figure S2. Characterization of consensus WT1-specific IFN- $\gamma$  responses and immunodominant epitopes for pSynConWT1-L vaccine.** (a) Frequency of WT1-specific IFN- $\gamma$  spot-forming units (SFU) per million splenocytes isolated from vaccinated mice, determined by IFN- $\gamma$  ELISpot assay using consensus peptides. Mice were vaccinated with the same dose and schedule shown in Figure 2. (b) Matrix mapping to determine the WT1 consensus-specific immunodominant epitopes, comparing naïve and pSynConWT1-L vaccinated mice. (c) List of immunodominant epitopes identified in the matrix mapping in (b), and comparison to the corresponding native mouse sequence. Error bars represent the average  $\pm$  SEM.

**Figure S3. Characterization of mouse WT1-specific IFN- $\gamma$  responses and immunodominant epitopes for pSynConWT1-L vaccine.** (a) DNA vaccine immunization schedule showing the dosage of vaccine. C57BL/6 (B6) mice (n=5 per group) were immunized at weeks 0, 2, 4 and 6 with pSynConWT1-L via IM/electroporation. (b) Matrix mapping to determine the WT1 mouse-specific immunodominant epitopes, comparing naïve and pSynConWT1-L vaccinated mice, measured by IFN- $\gamma$  ELISpot. (c) List of immunodominant epitopes identified in the matrix mapping in (b), and comparison to the corresponding SynCon sequence. Error bars represent the average  $\pm$  SEM.

**Figure S4. Anti-tumor immunity elicited by pSynConWT1-L.** (a) Mice were challenged with  $10^6$  mWT1-C1498 tumor cells injected subcutaneously, and were vaccinated weekly starting 3 days post-tumor implant. Tumor measurements are reported in terms of tumor volume, only for surviving mice until day 28. (b) Survival data from the tumor therapeutic challenge in (a). Vaccination with pSynConWT1-L extended survival in tumor-bearing mice. Error bars represent the average  $\pm$  SEM.

**Figure S5. Anti-tumor immunity elicited by pSynCon WT1-S compared to pMuWT1-opt.** (a) Mice were challenged with  $10^6$  mWT1-C1498 tumor cells injected subcutaneously, and were vaccinated weekly starting 3 days post-tumor implant. Tumor measurements are reported in terms of tumor volume until day 18. (b) Survival data from the tumor therapeutic challenge in (a). Error bars represent the average  $\pm$  SEM.

**Table S1. Assessment of physiological parameters in rhesus macaques immunized with pSynConWT1-L.** No significant weight loss was observed and WBC counts remained within normal range. No elevation of alkaline phosphatase (ALK P), alanine aminotransferase (ALT), aspartate aminotransferase (AST) and total bilirubin (TBIL) indicated that induction of WT1-specific immune responses did not cause significant damage to the liver. No evidence of impaired kidney function was seen, as Creatinine and Blood Urea Nitrogen (BUN) remained within normal limits. Creatine phosphokinase (CPK) was evaluated to determine if EP or induction of immune responses negatively influenced skeletal or cardiac muscle. Elevation of CPK was not detected. Overall, we did not observe any vaccine-induced adverse effects in NHP despite evidence of strong *WT1*-specific CTLs *in vivo*.
